# Supplementary material for: Facultative parthenogenesis in the Ryukyu drywood termite Neotermes koshunensis
Source: PubMed Central journal article supplement (PMC4964353; doi:10.1038/srep30712), 2016-07-28
Supplement: srep30712-s1.pdf [file srep30712-s1.pdf]

## Supporting Information file

**Title:** Facultative parthenogenesis in the Ryukyu drywood termite *Neotermes koshunensis*

**Authors:** Kazuya Kobayashi<sup>\*†</sup>, Yasushi Miyaguni<sup>†</sup>

**Affiliations:**

Laboratory of Insect Ecology, Graduate School of Agriculture, Kyoto University, Oiwake-cho, Kitashirakawa, Sakyo-ku, Kyoto 606-8502, Japan

\* Correspondence to: [kobakaz@kais.kyoto-u.ac.jp](mailto:kobakaz@kais.kyoto-u.ac.jp)

† These authors contributed equally to the manuscript.

**Table S1.** Primer sequences and diversity statistics for nine microsatellite loci isolated from *Neotermes koshunensis*.

| Locus name | Primer sequence (5'-3')                                | Repeat motif                             | Allele size range (bp) | Genetic diversity |       |       |            |
|------------|--------------------------------------------------------|------------------------------------------|------------------------|-------------------|-------|-------|------------|
|            |                                                        |                                          |                        | $N_A$             | $H_O$ | $H_E$ | $p$ -value |
| NK14-8     | F:ttggcaaccgctggagtga<br>R:attgacctcttgcccatgc         | (CA) <sub>10</sub>                       | 141-169                | 6                 | 0.563 | 0.766 | 0.101      |
| *NK14-7    | F:agaagctgaaaagcggtcacgg<br>R:tcattggtgactcgtctctggtg  | (ATAG) <sub>10</sub> (ACAG) <sub>4</sub> | 208-221                | 5                 | 0.313 | 0.387 | 0.108      |
| NK14-5     | F:gggaacattcgccgttgaag<br>R:cgacatttggtgcggacgta       | (GT) <sub>14</sub>                       | 209-228                | 5                 | 0.625 | 0.540 | 0.547      |
| *NK12-2    | F:tctggtcagtgacagtagga<br>R:cccgactccaagttaacca        | (CA) <sub>15</sub>                       | 321-327                | 2                 | 0.125 | 0.121 | 1.000      |
| NK12-1     | F:cagatatttcacagtagtgggact<br>R:gcacaatacatcctaaaagtgc | (TG) <sub>9</sub> (TATG) <sub>5</sub>    | 150-152                | 2                 | 0.000 | 0.226 | 0.029      |
| *NK08-7    | F:tttcagagcccttctgtga<br>R:gcacctggaggttacttgg         | (AC) <sub>12</sub>                       | 142-168                | 6                 | 0.688 | 0.758 | 0.169      |
| NK08-6     | F:gcaagtgcagtcagtgacggta<br>R:ggaaaaatttcatttaggtaaacg | (AC) <sub>10</sub>                       | 140-156                | 5                 | 0.438 | 0.492 | 0.142      |
| *NK08-2    | F:tgccaaaagtcaagggttc<br>R:acaaggactccaaccatgc         | (GT) <sub>17</sub>                       | 137-156                | 6                 | 0.813 | 0.798 | 0.082      |
| *NK06-8    | F:ctgcaagccggacgggtat<br>R:ccaaatcttcatatcgctatcattcg  | (CA) <sub>11</sub>                       | 162-180                | 4                 | 0.563 | 0.625 | 0.791      |

Shown are locus names, the forward (F) and reverse (R) primer sequence, repeat motif of the sequenced clone, allele size range in base pairs, the number of alleles ( $N_A$ ), observed heterozygosity ( $H_O$ ), and expected heterozygosity ( $H_E$ ) in the Okinawa island ( $n = 16$  workers, each from different colony), and  $p$ -value associated with departure from Hardy-Weinberg Equilibrium. Asterisks on the locus name indicate these loci showed heterozygosities in the inferred mother of the parthenogenetic offspring.

**Table S2.** Results of the microsatellite analysis for the five FM colonies.

| Colony code                   | Sample name                   | Locus names     |         |         |         |         |         |         |         |         |         |
|-------------------------------|-------------------------------|-----------------|---------|---------|---------|---------|---------|---------|---------|---------|---------|
|                               |                               | NK14-7          | NK06-8  | NK14-5  | NK14-8  | NK08-6  | NK12-1  | NK12-2  | NK08-2  | NK08-7  |         |
| F <sub>A</sub> M <sub>B</sub> | Female founder                | 145/153         | 208/208 | 209/209 | 327/327 | 151/151 | 154/154 | 144/148 | 147/147 | 162/164 |         |
|                               | Male founder                  | 141/145         | 208/208 | 209/220 | 327/327 | 151/151 | 154/162 | 144/144 | 153/153 | 162/164 |         |
|                               | Larva 1                       | 145/153         | 208/208 | 209/209 | 327/327 | 151/151 | 154/154 | 144/144 | 147/153 | 162/162 |         |
|                               | Larva 2                       | 145/153         | 208/208 | 209/220 | 327/327 | 151/151 | 154/162 | 144/144 | 147/153 | 162/164 |         |
|                               | Larva 3                       | 145/153         | 208/208 | 209/220 | 327/327 | 151/151 | 154/162 | 144/148 | 147/153 | 164/164 |         |
|                               | Larva 4                       | 145/145         | 208/208 | 209/209 | 327/327 | 151/151 | 154/154 | 144/144 | 147/153 | 164/164 |         |
|                               | Larva 5                       | 145/153         | 208/208 | 209/220 | 327/327 | 151/151 | 154/162 | 144/144 | 147/153 | 162/164 |         |
|                               | Larva 6                       | 145/153         | 208/208 | 209/220 | 327/327 | 151/151 | 154/162 | 144/144 | 147/153 | 162/162 |         |
|                               | Larva 7                       | 145/145         | 208/208 | 209/209 | 327/327 | 151/151 | 154/154 | 144/144 | 147/153 | 162/164 |         |
|                               | Larva 8                       | 141/153         | 208/208 | 209/220 | 327/327 | 151/151 | 154/162 | 144/144 | 147/153 | 162/164 |         |
|                               | Larva 9                       | 145/145         | 208/208 | 209/209 | 327/327 | 151/151 | 154/154 | 144/144 | 147/153 | 162/164 |         |
|                               | Larva 10                      | 141/153         | 208/208 | 209/220 | 327/327 | 151/151 | 154/162 | 144/148 | 147/153 | 164/164 |         |
|                               | Egg 1                         | 145/153         | 208/208 | 209/220 | 327/327 | 151/151 | 154/162 | 144/148 | 147/153 | 162/162 |         |
|                               | Egg 2                         | 141/145         | 208/208 | 209/209 | 327/327 | 151/151 | 154/154 | 144/144 | 147/153 | 162/164 |         |
|                               | Egg 3                         | 141/153         | 208/208 | 209/220 | 327/327 | 151/151 | 154/162 | 144/144 | 147/153 | 162/164 |         |
|                               | Egg 4                         | 145/145         | 208/208 | 209/209 | 327/327 | 151/151 | 154/154 | 144/148 | 147/153 | 164/164 |         |
|                               | Segregation ratios            |                 |         |         |         |         |         |         |         |         |         |
|                               | Expected                      | 1:1:1:1         | 1       | 1:1     | 1       | 1       | 1:1     | 1:1     | 1       | 1:2:1   |         |
|                               | Observed                      | 1:3:4:6         | 1       | 6:8     | 1       | 1       | 6:8     | 10:4    | 1       | 3:7:4   |         |
|                               | <i>p</i> -value               | 0.4085          | 1.0     | 1.0     | 1.0     | 1.0     | 1.0     | 0.4401  | 1.0     | 1.0     |         |
| F <sub>B</sub> M <sub>A</sub> | Female founder                | 141/145         | 208/208 | 209/209 | 327/327 | 151/151 | 154/154 | 144/148 | 147/153 | 164/164 |         |
|                               | Male founder                  | 141/141         | 208/208 | 209/220 | 327/327 | 151/151 | 154/162 | 144/144 | 147/153 | 162/164 |         |
|                               | Larva 1                       | 141/141         | 208/208 | 209/220 | 327/327 | 151/151 | 154/162 | 144/148 | 147/153 | 162/164 |         |
|                               | Larva 2                       | 141/145         | 208/208 | 209/220 | 327/327 | 151/151 | 154/162 | 144/144 | 153/153 | 162/164 |         |
|                               | Larva 3                       | 141/145         | 208/208 | 209/209 | 327/327 | 151/151 | 154/154 | 144/148 | 147/153 | 164/164 |         |
|                               | Larva 4                       | 141/145         | 208/208 | 209/209 | 327/327 | 151/151 | 154/154 | 144/148 | 147/147 | 164/164 |         |
|                               | Larva 5                       | 141/145         | 208/208 | 209/220 | 327/327 | 151/151 | 154/162 | 144/144 | 153/153 | 164/164 |         |
|                               | Larva 6                       | 141/141         | 208/208 | 209/220 | 327/327 | 151/151 | 154/162 | 144/148 | 153/153 | 164/164 |         |
|                               | Larva 7                       | 141/141         | 208/208 | 209/209 | 327/327 | 151/151 | 154/154 | 144/148 | 147/153 | 164/164 |         |
|                               | Larva 8                       | 141/145         | 208/208 | 209/209 | 327/327 | 151/151 | 154/154 | 144/148 | 147/153 | 164/164 |         |
|                               | Larva 9                       | 141/145         | 208/208 | 209/220 | 327/327 | 151/151 | 154/162 | 144/144 | 147/153 | 162/164 |         |
|                               | Segregation ratios            |                 |         |         |         |         |         |         |         |         |         |
|                               |                               | Expected        | 1:1     | 1       | 1:1     | 1       | 1       | 1:1     | 1:1     | 1:2:1   | 1:1     |
|                               |                               | Observed        | 3:6     | 9       | 4:5     | 9       | 9       | 4:5     | 3:6     | 1:5:3   | 3:6     |
|                               |                               | <i>p</i> -value | 0.6372  | 1.0     | 1.0     | 1.0     | 1.0     | 1.0     | 0.6372  | 0.6890  | 0.6372  |
|                               | F <sub>C</sub> M <sub>D</sub> | Female founder  | 141/145 | 208/208 | 209/209 | 327/327 | 151/151 | 154/154 | 144/144 | 147/147 | 164/164 |
|                               |                               | Male founder    | 153/153 | 208/208 | 209/225 | 327/327 | 151/151 | 154/162 | 144/144 | 145/147 | 162/162 |
| Larva 1                       |                               | 145/153         | 208/208 | 209/209 | 327/327 | 151/151 | 154/154 | 144/144 | 147/147 | 162/164 |         |
| Larva 2                       |                               | 145/153         | 208/208 | 209/209 | 327/327 | 151/151 | 154/154 | 144/144 | 147/147 | 162/164 |         |
| Larva 3                       |                               | 145/153         | 208/208 | 209/209 | 327/327 | 151/151 | 154/154 | 144/144 | 147/147 | 162/164 |         |
| Larva 4                       |                               | 141/153         | 208/208 | 209/209 | 327/327 | 151/151 | 154/154 | 144/144 | 147/147 | 162/164 |         |
| Larva 5                       |                               | 141/153         | 208/208 | 209/225 | 327/327 | 151/151 | 154/162 | 144/144 | 145/147 | 162/164 |         |
| Larva 6                       |                               | 141/153         | 208/208 | 209/209 | 327/327 | 151/151 | 154/154 | 144/144 | 147/147 | 162/164 |         |
| Larva 7                       |                               | 145/153         | 208/208 | 209/225 | 327/327 | 151/151 | 154/162 | 144/144 | 145/147 | 162/164 |         |
| Larva 8                       |                               | 141/153         | 208/208 | 209/225 | 327/327 | 151/151 | 154/162 | 144/144 | 145/147 | 162/164 |         |
| Larva 9                       |                               | 145/153         | 208/208 | 209/225 | 327/327 | 151/151 | 154/162 | 144/144 | 145/147 | 162/164 |         |
| Larva 10                      |                               | 141/153         | 208/208 | 209/209 | 327/327 | 151/151 | 154/154 | 144/144 | 147/147 | 162/164 |         |
| Larva 11                      |                               | 141/153         | 208/208 | 209/209 | 327/327 | 151/151 | 154/154 | 144/144 | 147/147 | 162/164 |         |
| Larva 12                      |                               | 145/153         | 208/208 | 209/225 | 327/327 | 151/151 | 154/162 | 144/144 | 145/147 | 162/164 |         |
| Larva 13                      |                               | 141/153         | 208/208 | 209/209 | 327/327 | 151/151 | 154/154 | 144/144 | 147/147 | 162/164 |         |
| Larva 14                      | 145/153                       | 208/208         | 209/209 | 327/327 | 151/151 | 154/154 | 144/144 | 147/147 | 162/164 |         |         |
| Segregation ratio             |                               |                 |         |         |         |         |         |         |         |         |         |

**Table S2.** Continued

|                               |                    |          |         |         |         |         |         |         |         |         |       |
|-------------------------------|--------------------|----------|---------|---------|---------|---------|---------|---------|---------|---------|-------|
|                               | Expected           | 1:1      | 1       | 1:1     | 1       | 1       | 1:1     | 1       | 1:1     | 1       |       |
|                               | Observed           | 7:7      | 14      | 5:9     | 14      | 14      | 5:9     | 14      | 5:9     | 14      |       |
|                               | <i>p</i> -value    | 1.0      | 1.0     | 0.7036  | 1.0     | 1.0     | 0.7036  | 1.0     | 0.7036  | 1.0     |       |
| F <sub>E</sub> M <sub>F</sub> | Female founder     | 153/153  | 208/208 | 209/209 | 327/327 | 151/151 | 154/154 | 144/144 | 153/153 | 162/164 |       |
|                               | Male founder       | 141/153  | 208/214 | 209/220 | 327/327 | 151/151 | 154/162 | 144/144 | 145/153 | 162/164 |       |
|                               | Larva 1            | 141/153  | 208/214 | 209/220 | 327/327 | 151/151 | 154/162 | 144/144 | 153/153 | 164/164 |       |
|                               | Larva 2            | 141/153  | 208/214 | 209/220 | 327/327 | 151/151 | 154/162 | 144/144 | 153/153 | 162/162 |       |
|                               | Larva 3            | 141/153  | 208/208 | 209/220 | 327/327 | 151/151 | 154/162 | 144/144 | 153/153 | 162/164 |       |
|                               | Larva 4            | 141/153  | 208/208 | 209/220 | 327/327 | 151/151 | 154/162 | 144/144 | 153/153 | 162/164 |       |
|                               | Larva 5            | 141/153  | 208/208 | 209/209 | 327/327 | 151/151 | 154/154 | 144/144 | 145/153 | 164/164 |       |
|                               | Larva 6            | 141/153  | 208/214 | 209/220 | 327/327 | 151/151 | 154/162 | 144/144 | 153/153 | 162/164 |       |
|                               | Larva 7            | 141/153  | 208/214 | 209/220 | 327/327 | 151/151 | 154/162 | 144/144 | 153/153 | 162/164 |       |
|                               | Egg 1              | 141/153  | 208/208 | 209/220 | 327/327 | 151/151 | 154/162 | 144/144 | 153/153 | 164/164 |       |
|                               | Egg 2              | 141/153  | 208/214 | 209/209 | 327/327 | 151/151 | 154/154 | 144/144 | 145/153 | 164/164 |       |
|                               | Egg 3              | 141/153  | 208/208 | 209/220 | 327/327 | 151/151 | 154/162 | 144/144 | 153/153 | 162/162 |       |
|                               | Egg 4              | 141/153  | 208/214 | 209/209 | 327/327 | 151/151 | 154/154 | 144/144 | 145/153 | 162/164 |       |
|                               | Egg 5              | 141/153  | 208/208 | 209/209 | 327/327 | 151/151 | 154/154 | 144/144 | 145/153 | 162/164 |       |
|                               | Egg 6              | 141/153  | 208/214 | 209/209 | 327/327 | 151/151 | 154/154 | 144/144 | 145/153 | 164/164 |       |
|                               | Segregation ratios |          |         |         |         |         |         |         |         |         |       |
|                               |                    | Expected | 1:1     | 1:1     | 1:1     | 1       | 1       | 1:1     | 1       | 1:1     | 1:2:1 |
|                               | Observed           | 0:13     | 6:7     | 5:8     | 13      | 13      | 5:8     | 13      | 5:8     | 2:6:5   |       |
|                               | <i>p</i> -value    | 0.0052*  | 1.0     | 0.6951  | 1.0     | 1.0     | 0.6951  | 1.0     | 0.6951  | 0.5451  |       |
| F <sub>F</sub> M <sub>E</sub> | Female founder     | 141/141  | 208/208 | 209/209 | 327/327 | 149/149 | 154/154 | 148/148 | 153/153 | 164/164 |       |
|                               | Male founder       | 141/153  | 208/208 | 209/225 | 327/327 | 149/149 | 154/162 | 140/148 | 145/145 | 164/164 |       |
|                               | Larva 1            | 141/141  | 208/208 | 209/225 | 327/327 | 149/149 | 154/162 | 148/148 | 145/153 | 164/164 |       |
|                               | Larva 2            | 141/141  | 208/208 | 209/209 | 327/327 | 149/149 | 154/154 | 140/148 | 145/153 | 164/164 |       |
|                               | Larva 3            | 141/153  | 208/208 | 209/209 | 327/327 | 149/149 | 154/154 | 148/148 | 145/153 | 164/164 |       |
|                               | Larva 4            | 141/153  | 208/208 | 209/209 | 327/327 | 149/149 | 154/154 | 140/148 | 145/153 | 164/164 |       |
|                               | Larva 5            | 141/153  | 208/208 | 209/209 | 327/327 | 149/149 | 154/154 | 140/148 | 145/153 | 164/164 |       |
|                               | Larva 6            | 141/153  | 208/208 | 209/225 | 327/327 | 149/149 | 154/162 | 140/148 | 145/153 | 164/164 |       |
|                               | Larva 7            | 141/141  | 208/208 | 209/225 | 327/327 | 149/149 | 154/162 | 148/148 | 145/153 | 164/164 |       |
|                               | Larva 8            | 141/153  | 208/208 | 209/209 | 327/327 | 149/149 | 154/154 | 140/148 | 145/153 | 164/164 |       |
|                               | Larva 9            | 141/153  | 208/208 | 209/225 | 327/327 | 149/149 | 154/162 | 148/148 | 145/153 | 164/164 |       |
|                               | Larva 10           | 141/153  | 208/208 | 209/209 | 327/327 | 149/149 | 154/154 | 140/148 | 145/153 | 164/164 |       |
| Segregation ratios            |                    |          |         |         |         |         |         |         |         |         |       |
|                               | Expected           | 1:1      | 1       | 1:1     | 1       | 1       | 1:1     | 1:1     | 1       | 1       |       |
|                               | Observed           | 3:7      | 10      | 4:6     | 10      | 10      | 4:6     | 4:6     | 10      | 10      |       |
|                               | <i>p</i> -value    | 0.6499   | 1.0     | 1.0     | 1.0     | 1.0     | 1.0     | 1.0     | 1.0     | 1.0     |       |

Colony code was consisted with the combination codes in the main text, thus the subscripts indicated natal colony of founders. Expected segregation ratios were calculated from the genotypes of parents. The *p*-values indicated the results of Fisher's exact tests. \*: the *p*-values presented here were not corrected for multiple testing. As we performed the test 45 times, the value was 0.234 after the correction with the holm method.
